# Supplementary material for: Drimane Sesquiterpene-Conjugated Amino Acids from a Marine Isolate of the Fungus Talaromyces minioluteus (Penicillium Minioluteum)
Source: PubMed Central journal article supplement (PMC4483645; doi:10.3390/md13063567), 2015-06-05
Supplement: marinedrugs-13-03567-s001.pdf [file marinedrugs-13-03567-s001.pdf]

## Supplementary Information

$^1\text{H}$  and  $^{13}\text{C}$  spectra of compounds 3–7.

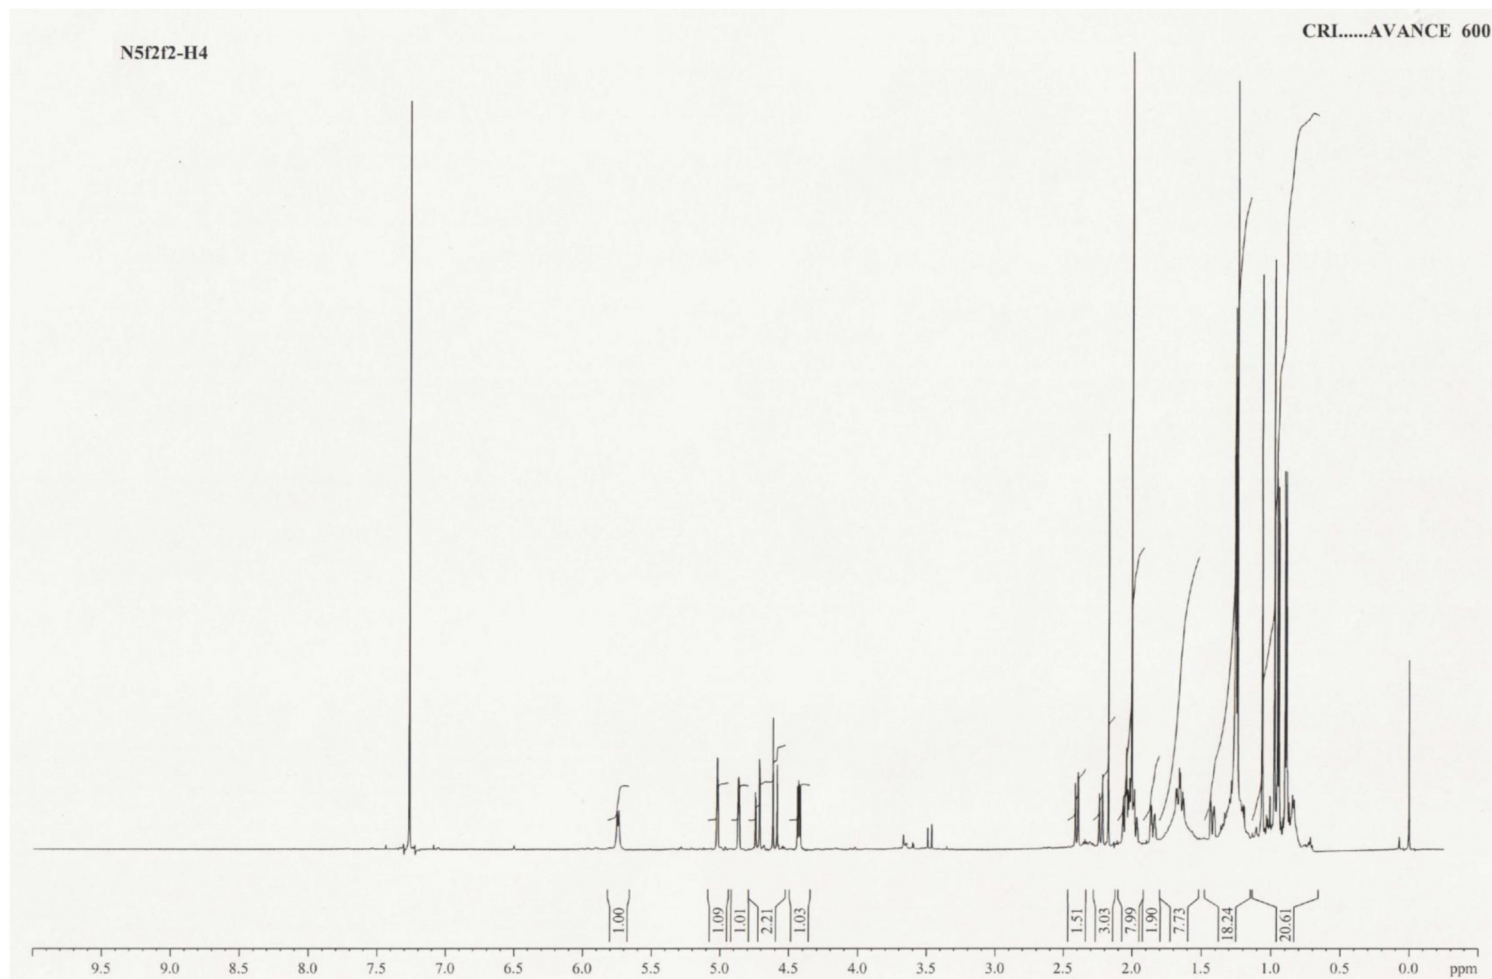

**Figure S1.**  $^1\text{H}$  NMR spectrum ( $\text{CDCl}_3$ ) of compound 3.

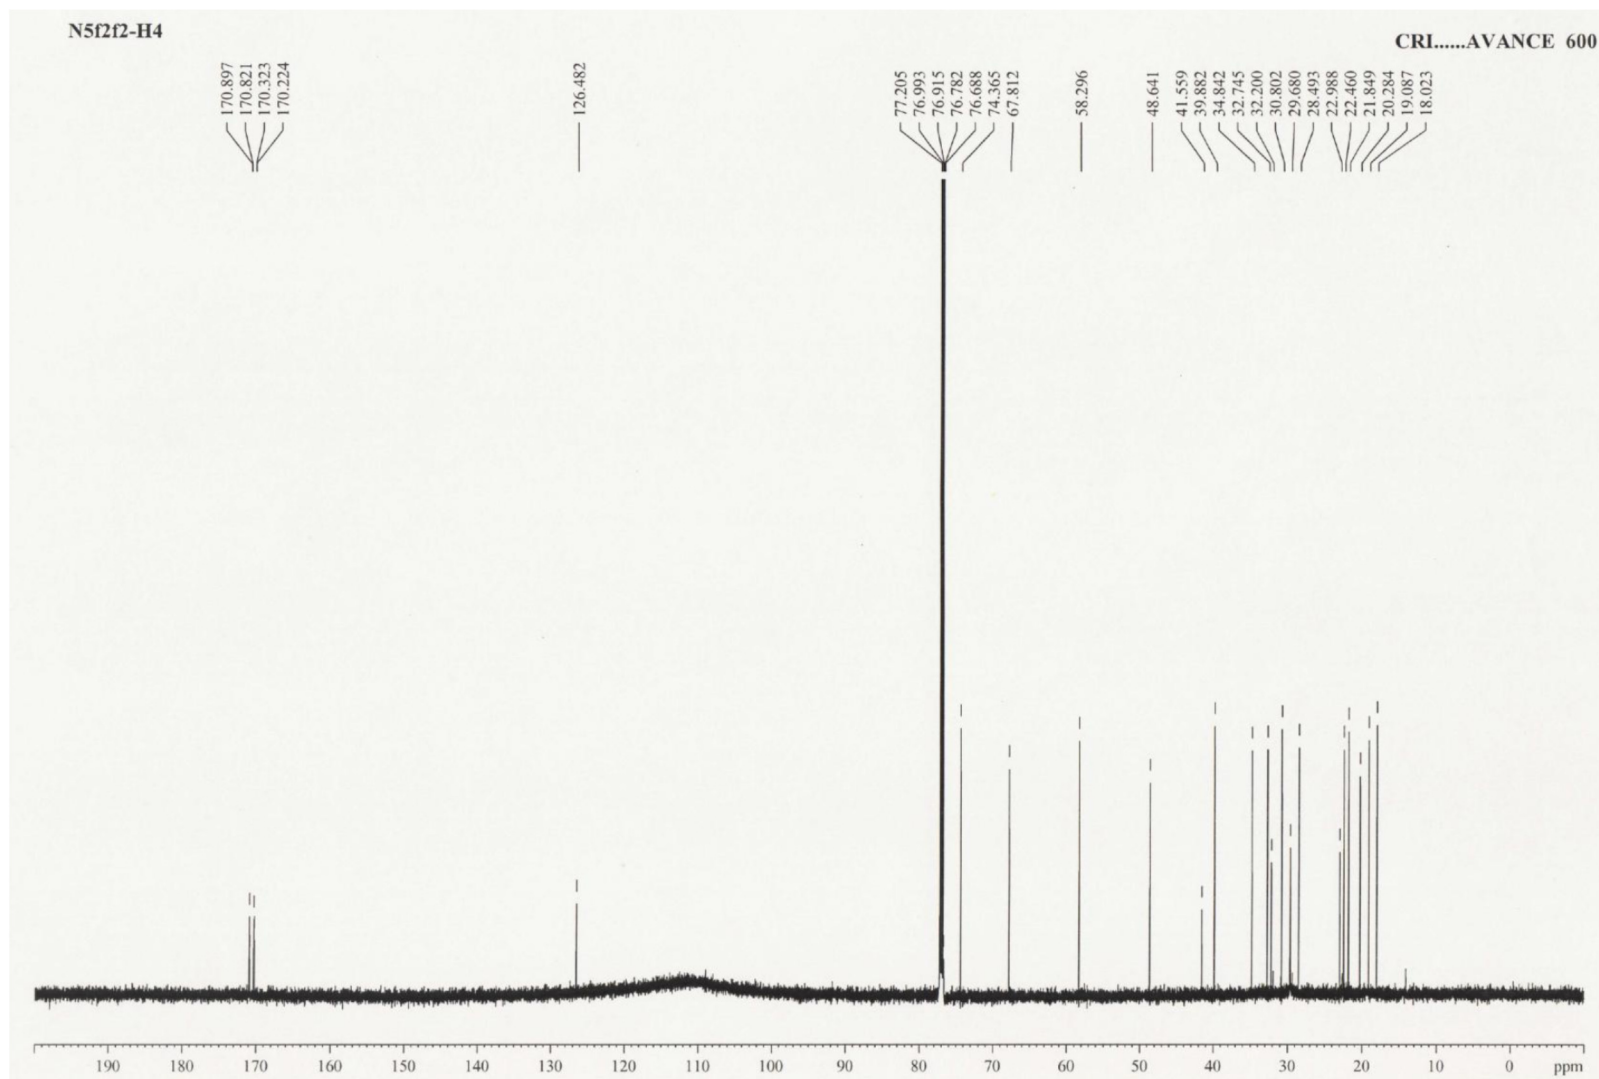

**Figure S2.**  $^{13}\text{C}$  NMR spectrum ( $\text{CDCl}_3$ ) of compound 3.

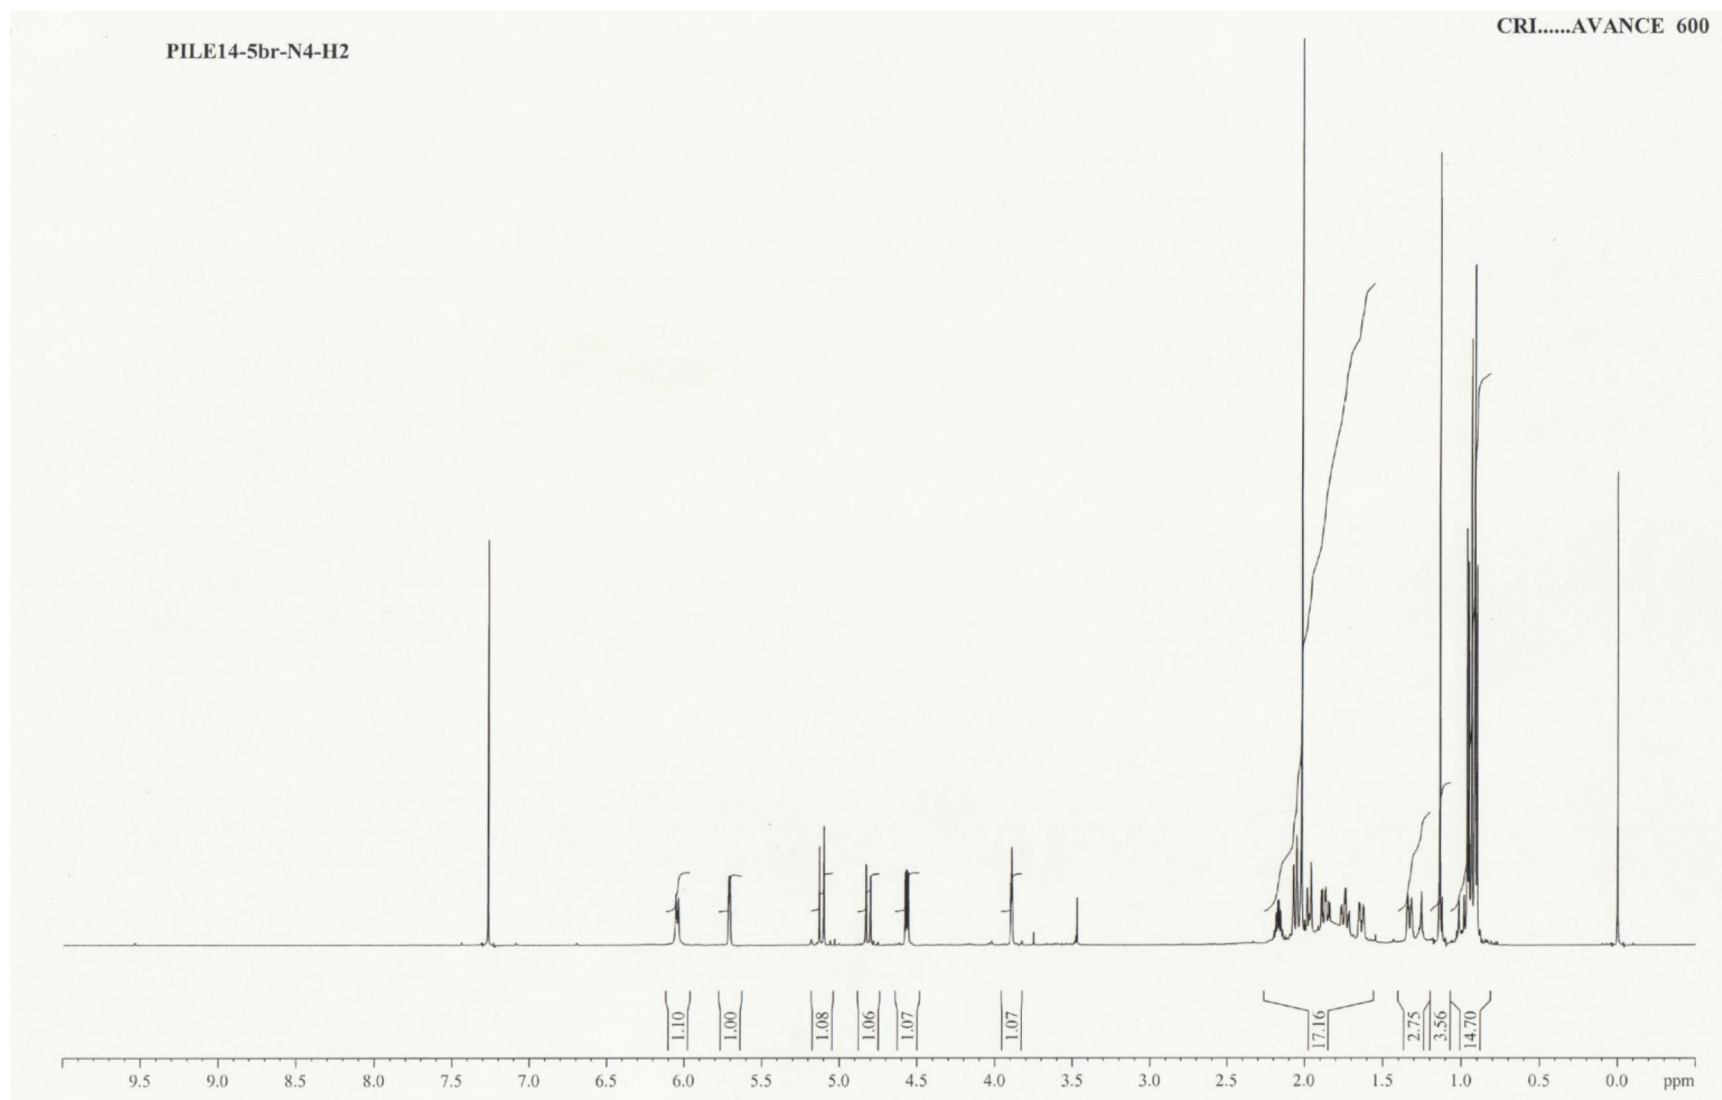

**Figure S3.** <sup>1</sup>H NMR spectrum (CDCl<sub>3</sub>) of compound 4.

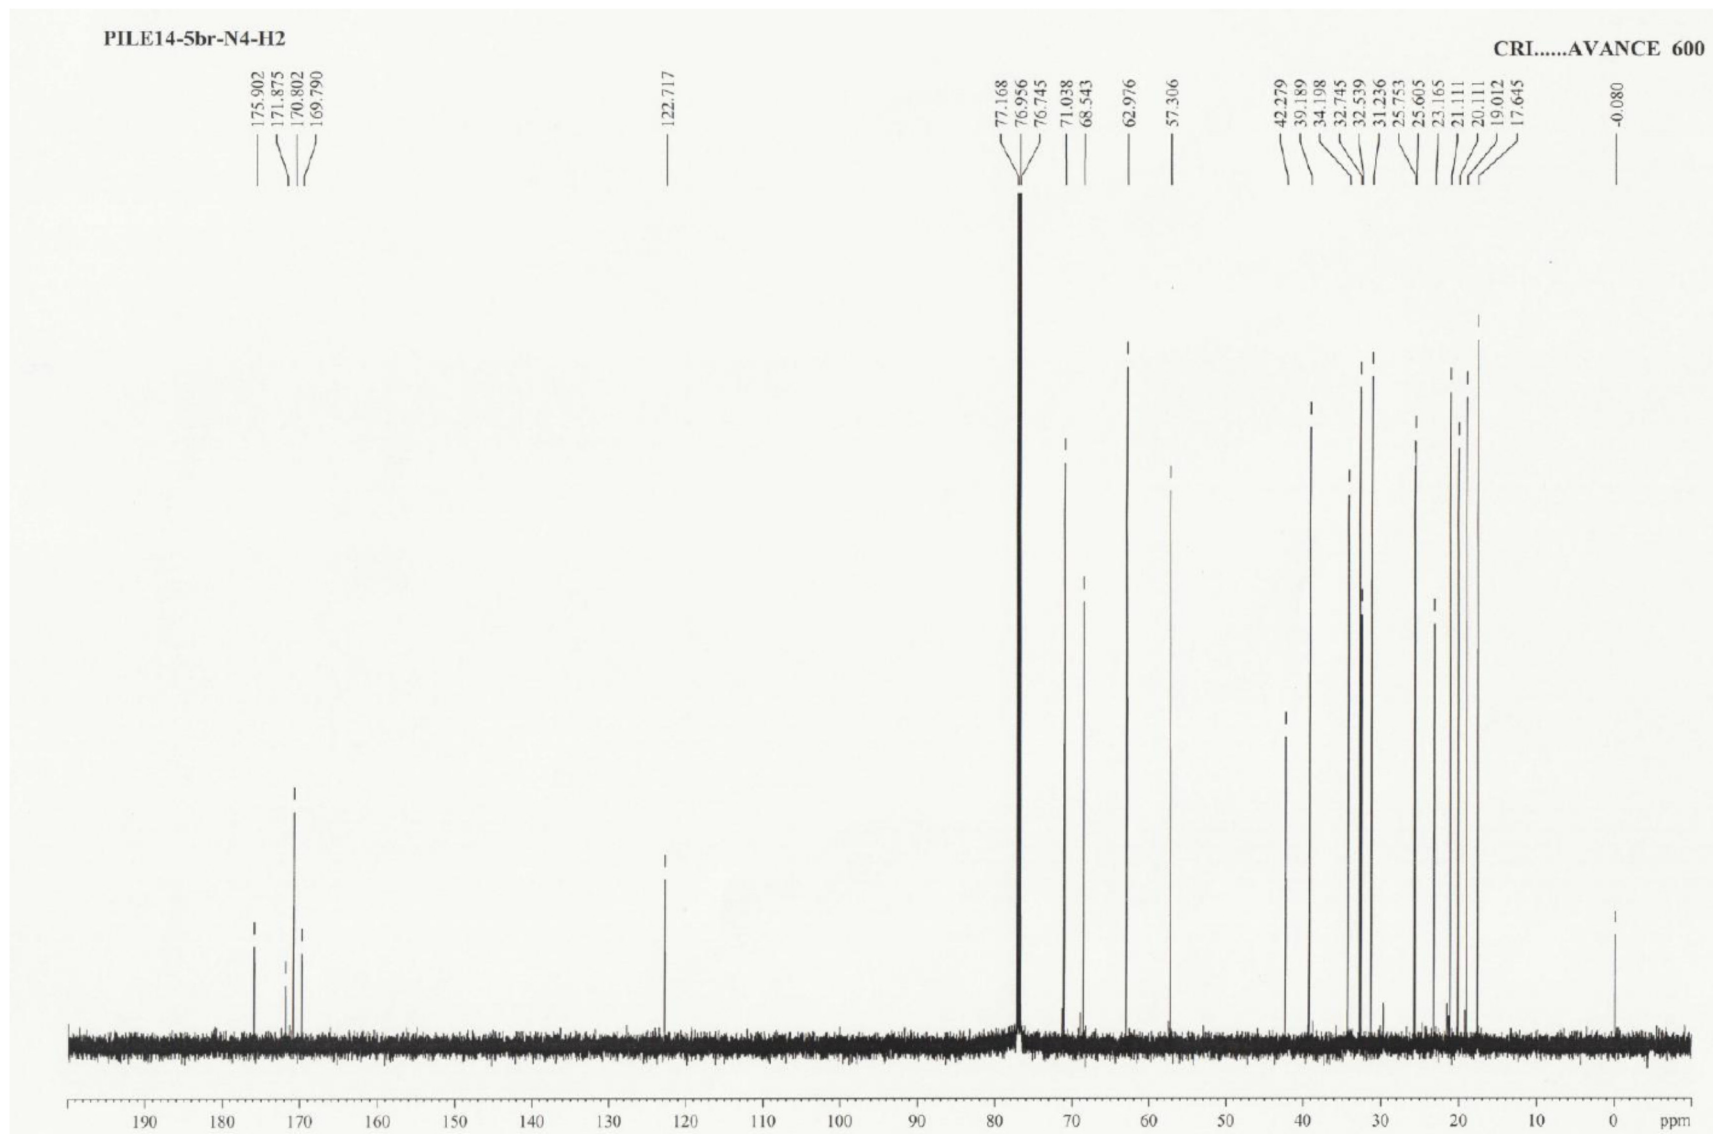

Figure S4.  $^{13}\text{C}$  NMR spectrum ( $\text{CDCl}_3$ ) of compound 4.

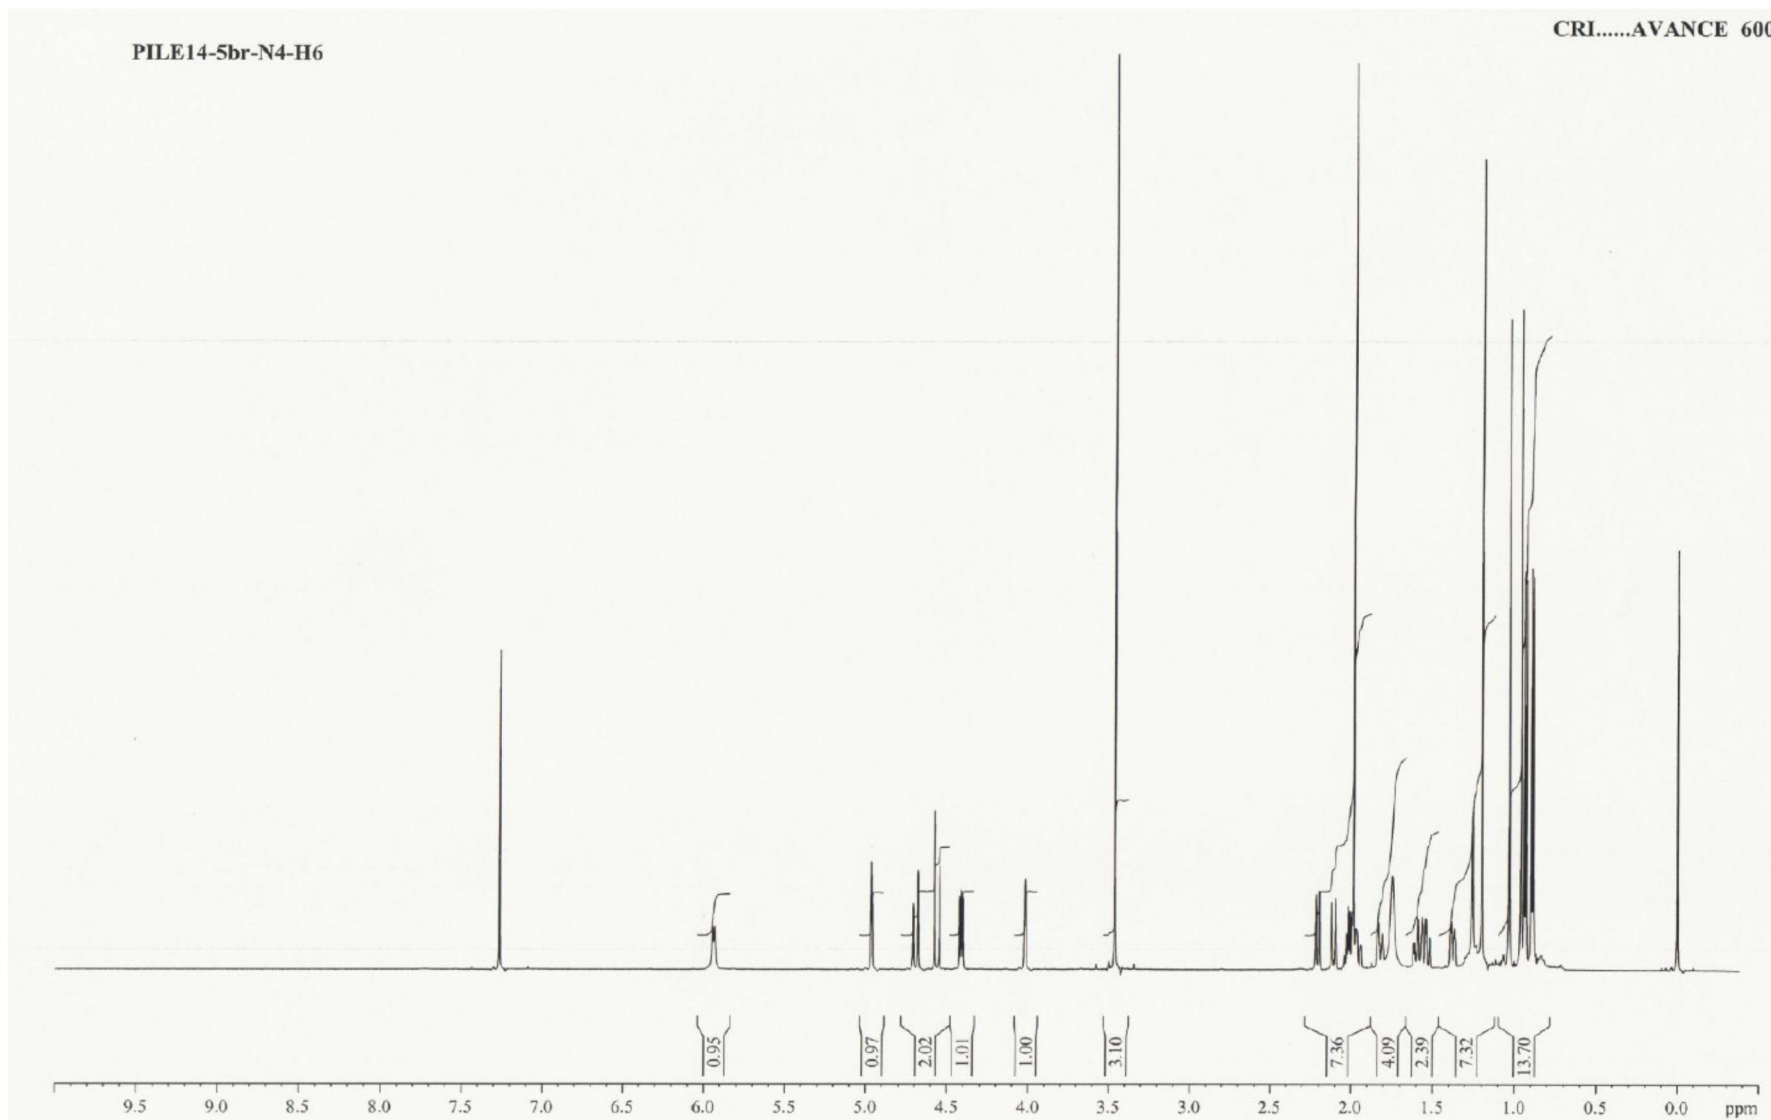

Figure S5. <sup>1</sup>H NMR spectrum (CDCl<sub>3</sub>) of compound 5.

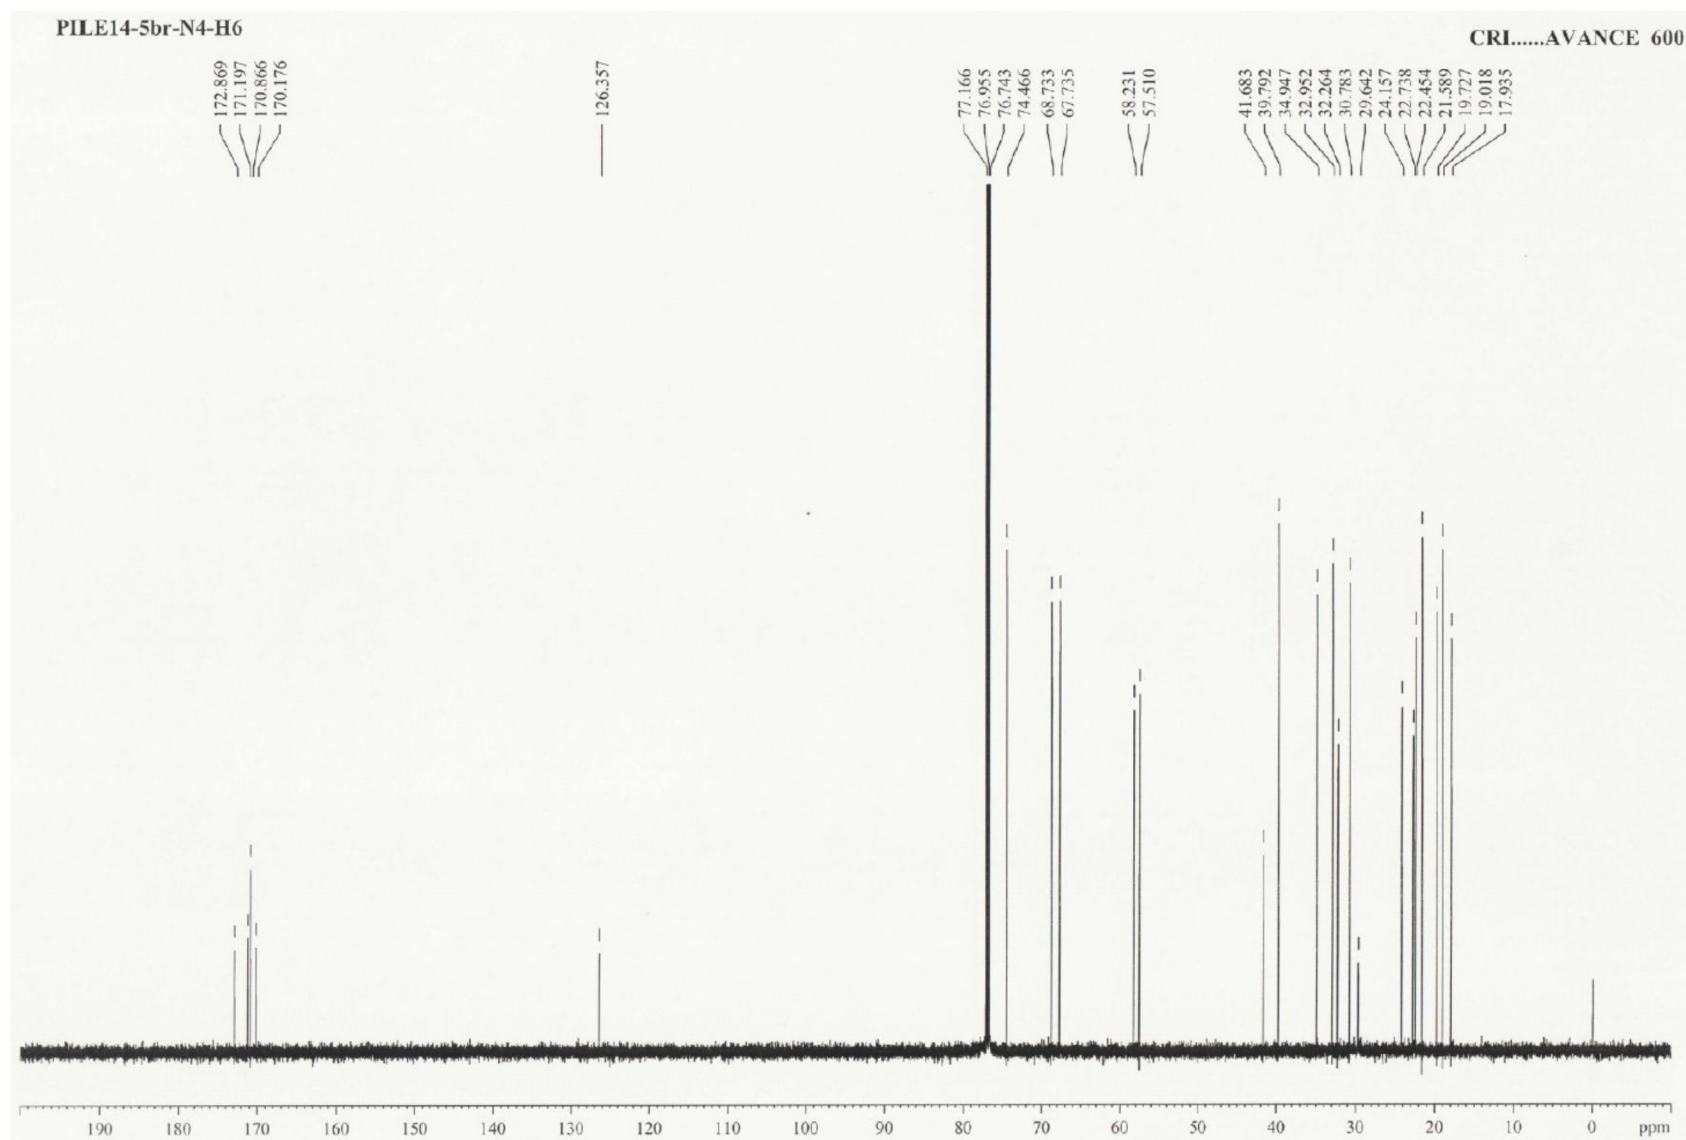

Figure S6.  $^{13}\text{C}$  NMR spectrum ( $\text{CDCl}_3$ ) of compound 5.

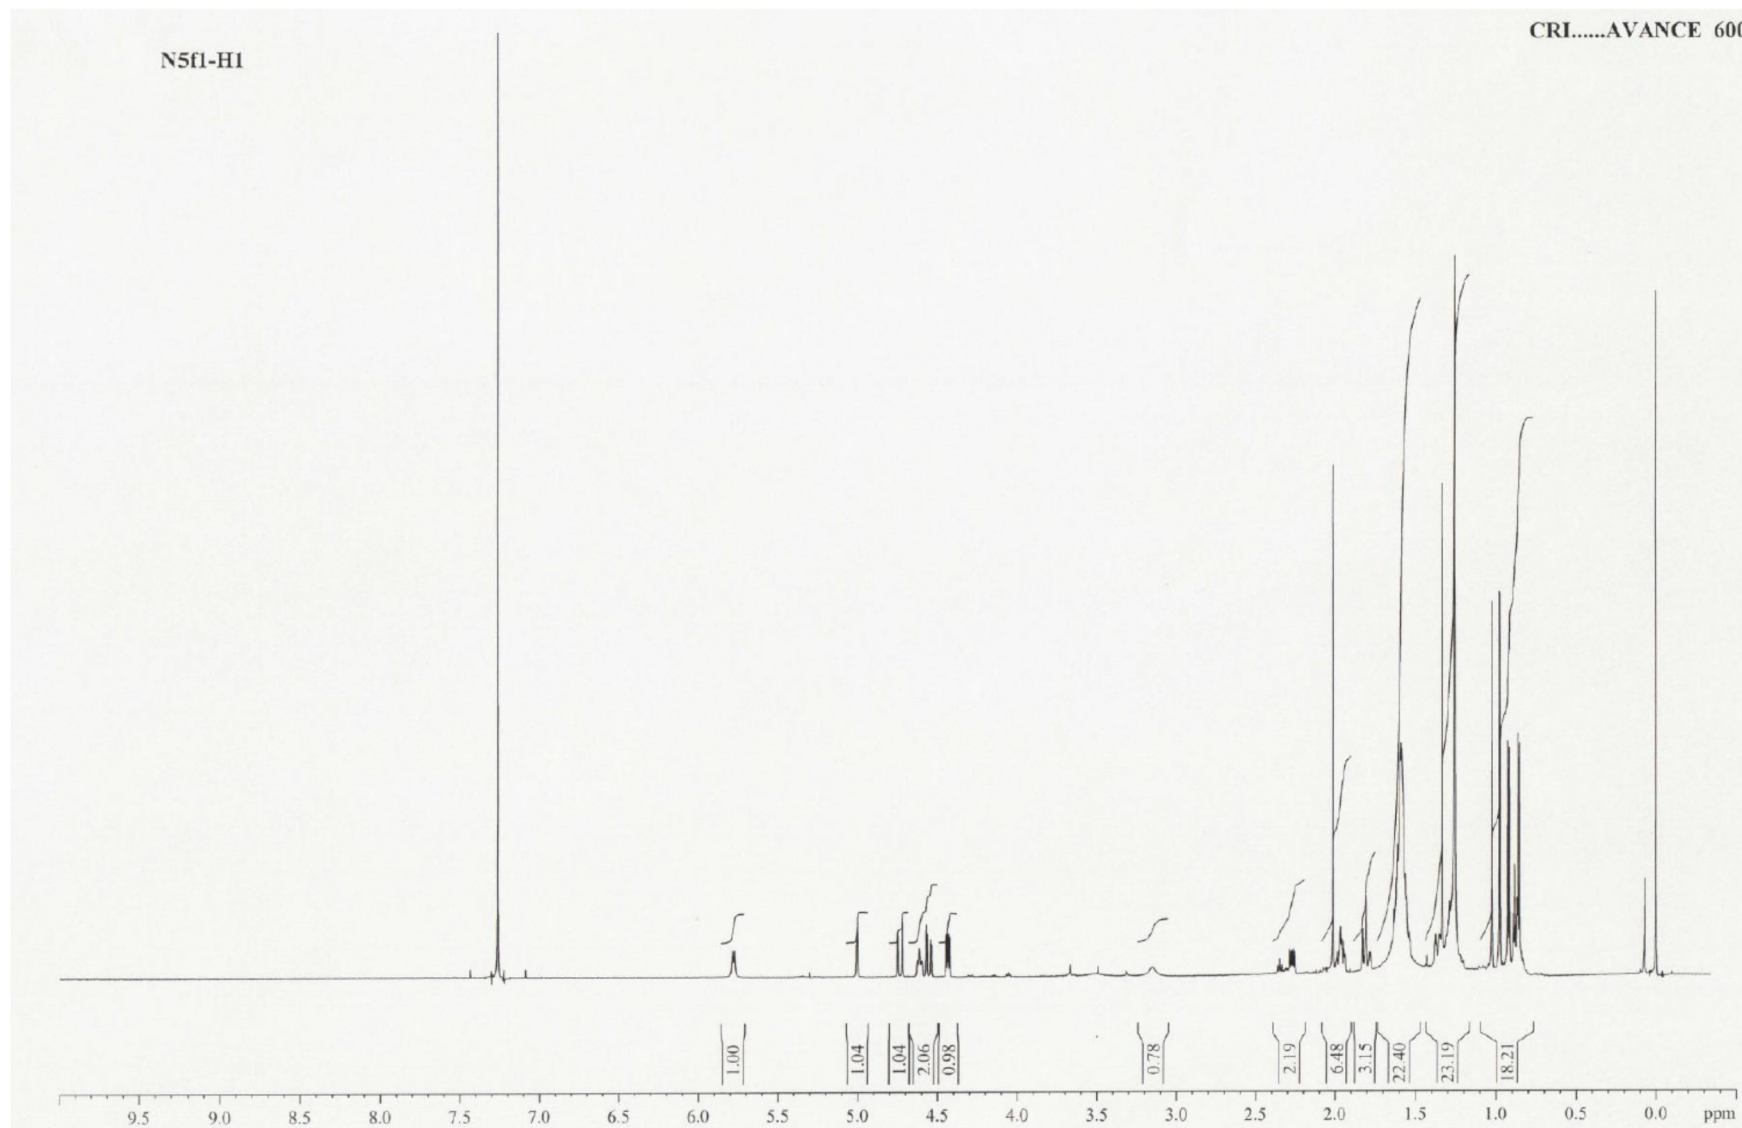

Figure S7. <sup>1</sup>H NMR spectrum (CDCl<sub>3</sub>) of compound 6.

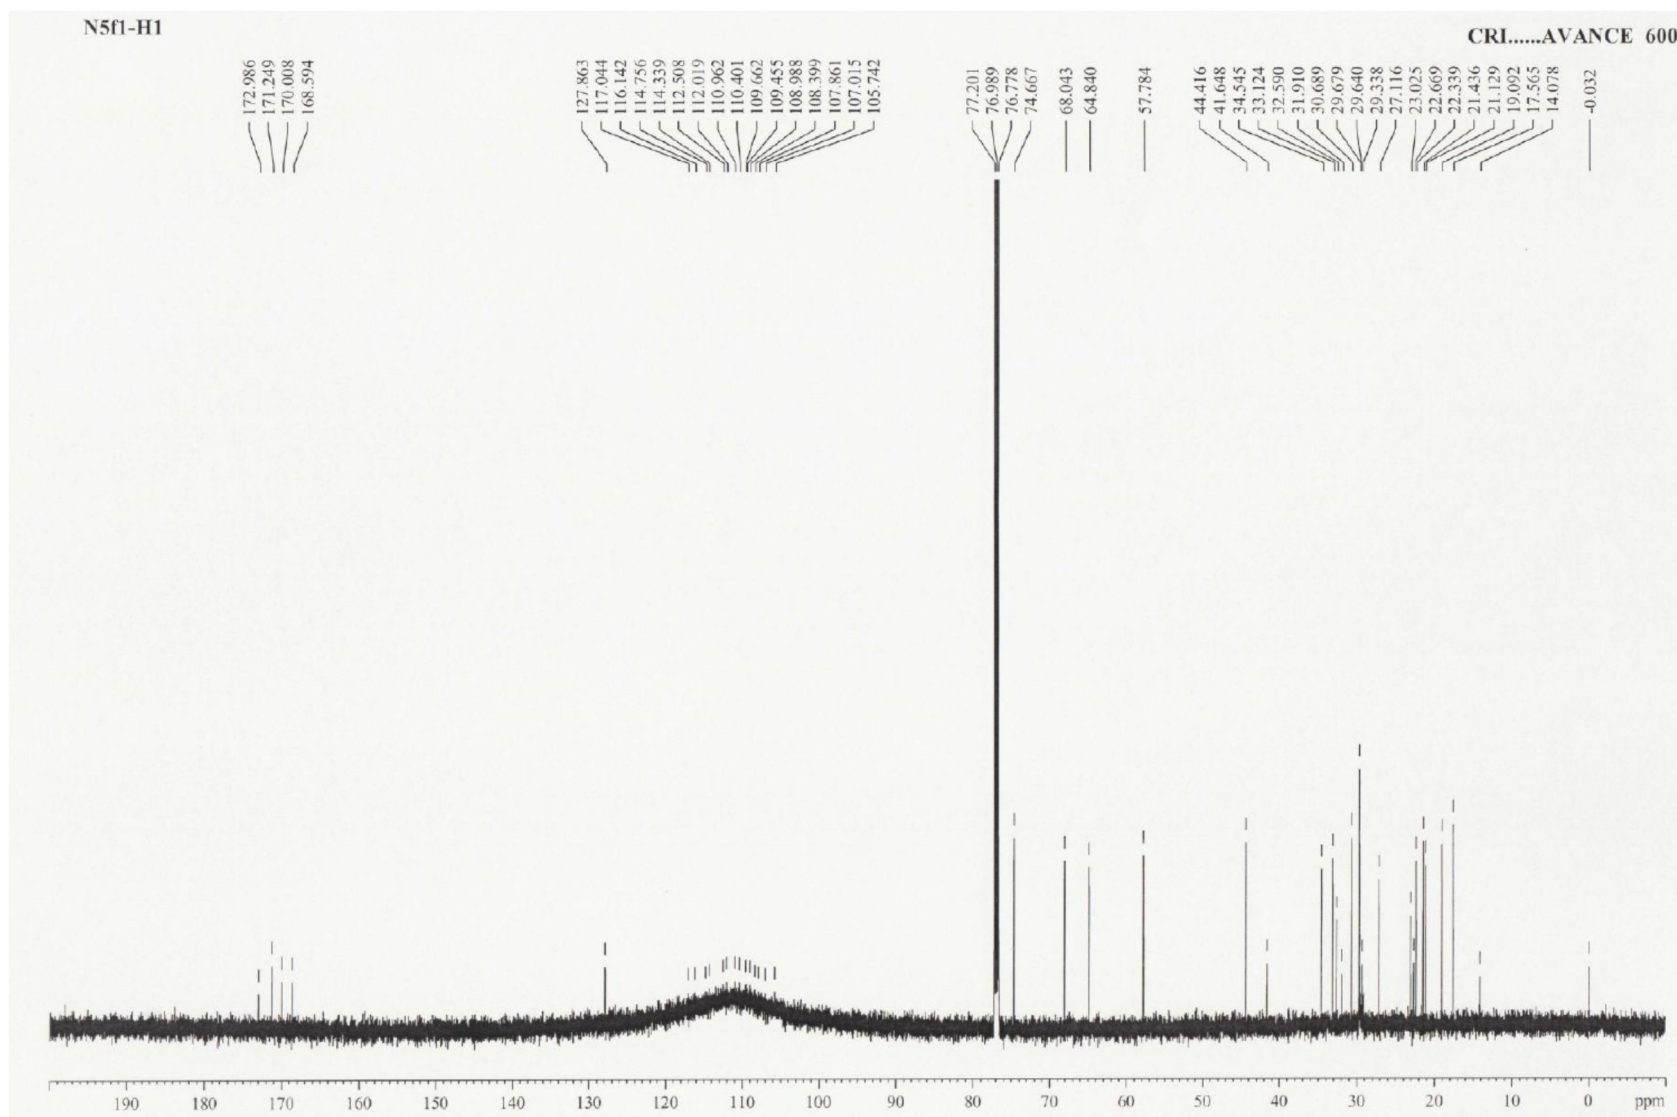

**Figure S8.**  $^{13}\text{C}$  NMR spectrum ( $\text{CDCl}_3$ ) of compound **6**.



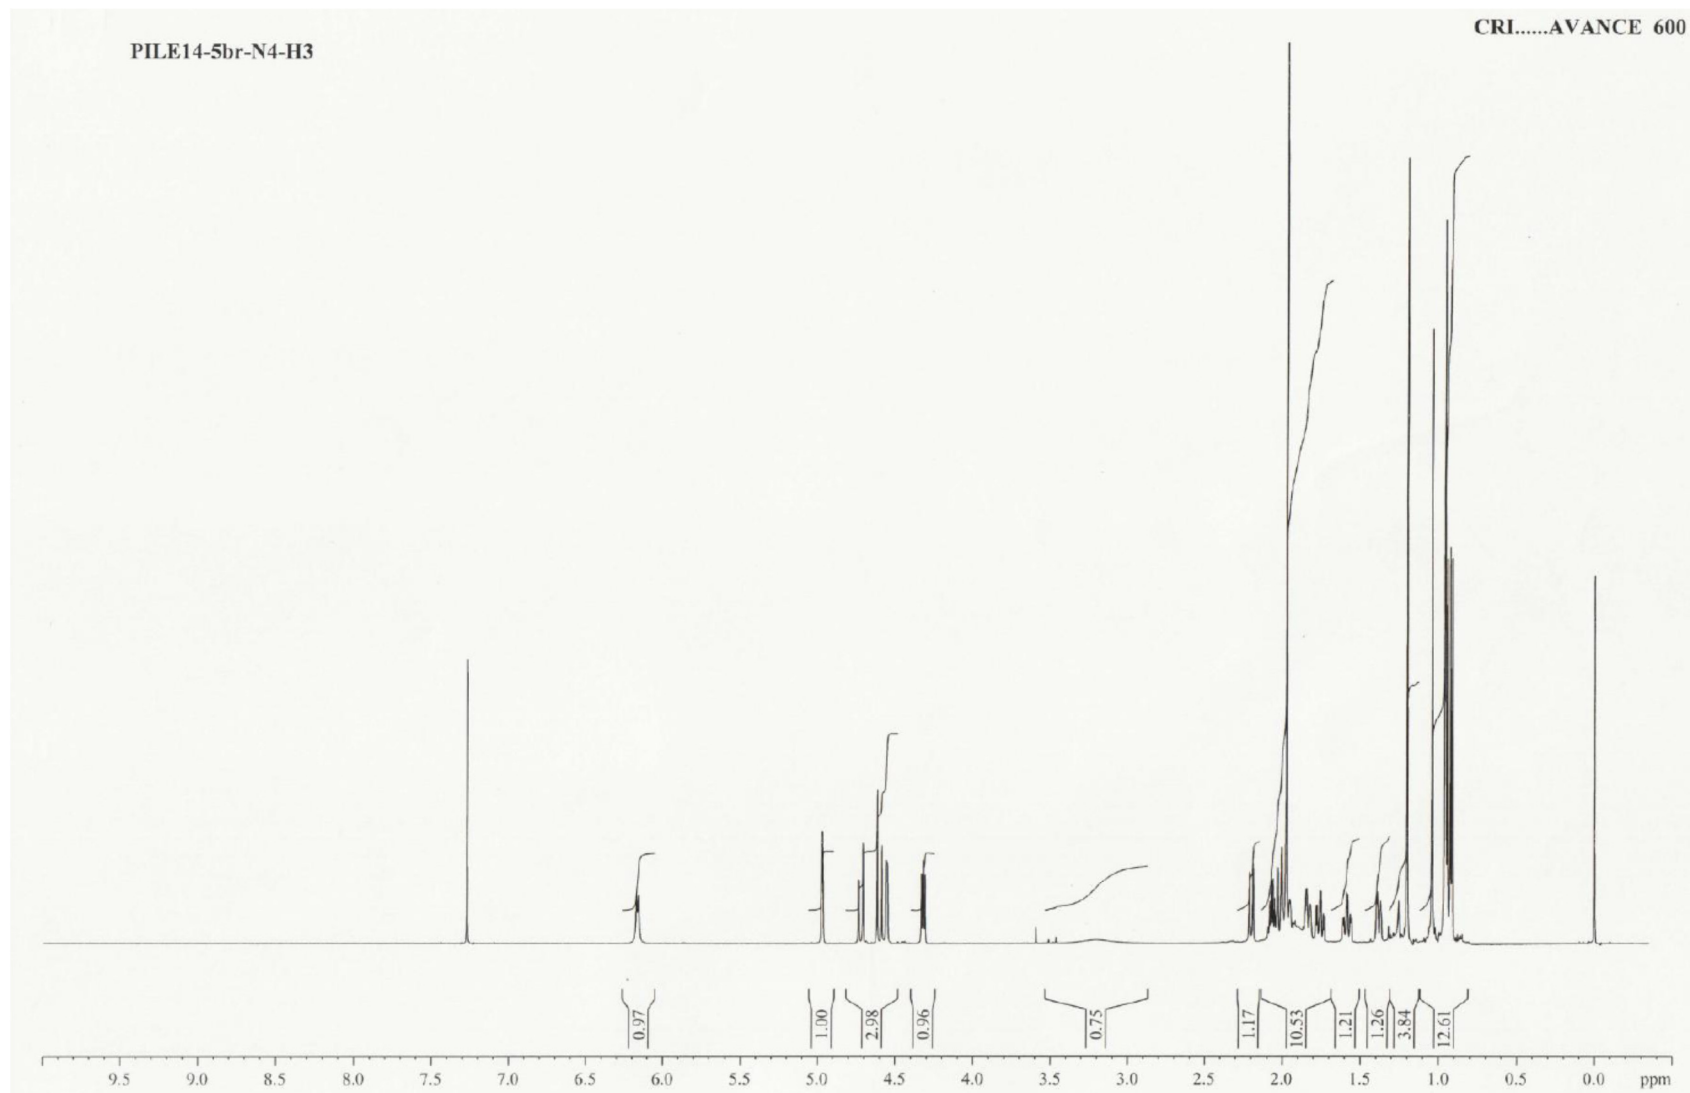

**Figure S9.** <sup>1</sup>H NMR spectrum (CDCl<sub>3</sub>) of compound 7.

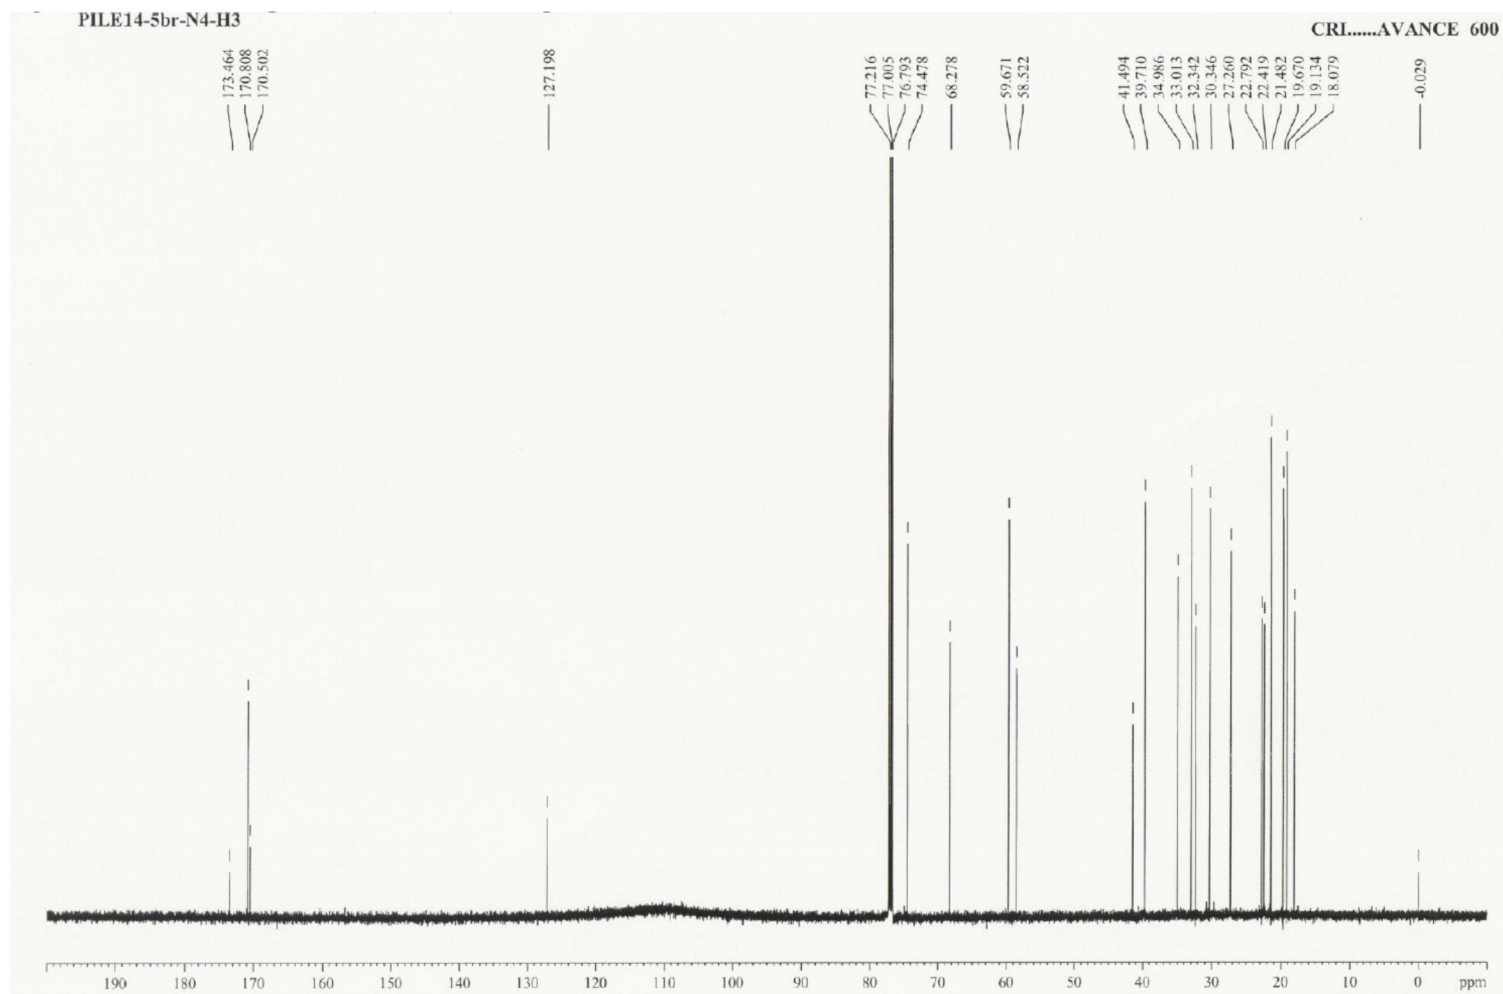

**Figure S10.**  $^{13}\text{C}$  NMR spectrum ( $\text{CDCl}_3$ ) of compound 7.
